# Supplementary material
Source: publisher figshare collection journal article supplement (https://karger.figshare.com/ndownloader/files/17798294)
Supplement: Supplementary file 1 [file 17798294]

Assessment of quality of life in postmenopausal women with early breast cancer participating in the PACT trial: the impact of additional patient information material packages and patient compliance

**Short title: Quality of life in early breast cancer**

**Authors‘ affiliations and address of correspondence**

C. Jackisch* • R. Kreienberg • M. Blettner • N. Harbeck • H.-J. Lück • R. Haidinger • D. C. Schmitt • H. Schulte • C. Windemuth-Kieselbach • S. Zaun** • P. Hadji

Christian Jackisch
Sana Klinikum Offenbach, Starkenburgring 66, D-63069 Offenbach, Germany
christian.jackisch@sana.de

Rolf Kreienberg
University of Ulm, Helmholtzstrasse 16, 89081 Ulm, Germany
r.kreienberg@t-online.de

Maria Blettner
Johannes-Gutenberg-University Mainz, Institute for Medical Biostatistics, Epidemiology and Informatics, Obere Zahlbacher Strasse. 69, 55131 Mainz, Germany
blettner@uni-mainz.de

Nadia Harbeck
Breast Center, University of Munich, Marchioninistrasse 15, 81377 Munich, Germany
Nadia.Harbeck@med.uni-muenchen.de

Hans-Joachim Lück
Gyn-Oncological Practice Hannover, Pelikanplatz 23, 30177 Hannover, Germany
hlueck@gyn-onko-praxis-hannover.de

Renate Haidinger
Brustkrebs Deutschland e.V., Lise-Meitner-Strasse 7, 85662 Hohenbrunn, Germany
renate.haidinger@brustkrebsdeutschland.de

Doris C. Schmitt
PATH Foundation, Schäftlarnstraße 62, 81371 München, Germany
schmitt@stiftungpath.org

Hilde Schulte
Frauenselbsthilfe nach Krebs e.V., Thomas-Mann-Strasse 40, 53111 Bonn, Germany
h.schulte.neukirchen@t-online.de

Christine Windemuth-Kieselbach
Alcedis GmbH, Winchesterstrasse 3, 35394 Gieβen, Germany
cwk@alcedis.de

Silke Zaun
AstraZeneca, Tinsdaler Weg 183, 22880 Wedel, Germany
silke.zaun@gmx.de

Peyman Hadji
Krankenhaus Nordwest, Steinbacher Hohl 2-26, 60488 Frankfurt, Germany
hadji@med.uni-marburg.de

**Former AstraZeneca employee

***Corresponding author:**
Christian Jackisch MD, PhD
Director Department of Obstetrics and Gynecology
Breast Cancer Center
Sana Klinikum Offenbach
Starkenburgring 66
D-63069 Offenbach
Germany
Christian.Jackisch@sana.de

# KEYWORDS

Aromatase inhibitors; Breast cancer; Compliance; Endocrine therapy

**Supplementary Material**

**Figure Legends**

**Supplementary fig. 1** Patient flow in the PACT program analyzed within this study

aLargest number of patients available for analysis with QoL questionnaire at this time point; patient numbers varied across individual scale items. A QoL questionnaire was completed at any point by 4253 patients. *FU* follow-up
